# Supplementary material for: Polyphenol Effects on Cholesterol Metabolism via Bile Acid Biosynthesis, CYP7A1: A Review
Source: MDPI journal article supplement (doi:10.3390/nu11112588), 2019-10-28
Supplement: s1 [file s1]

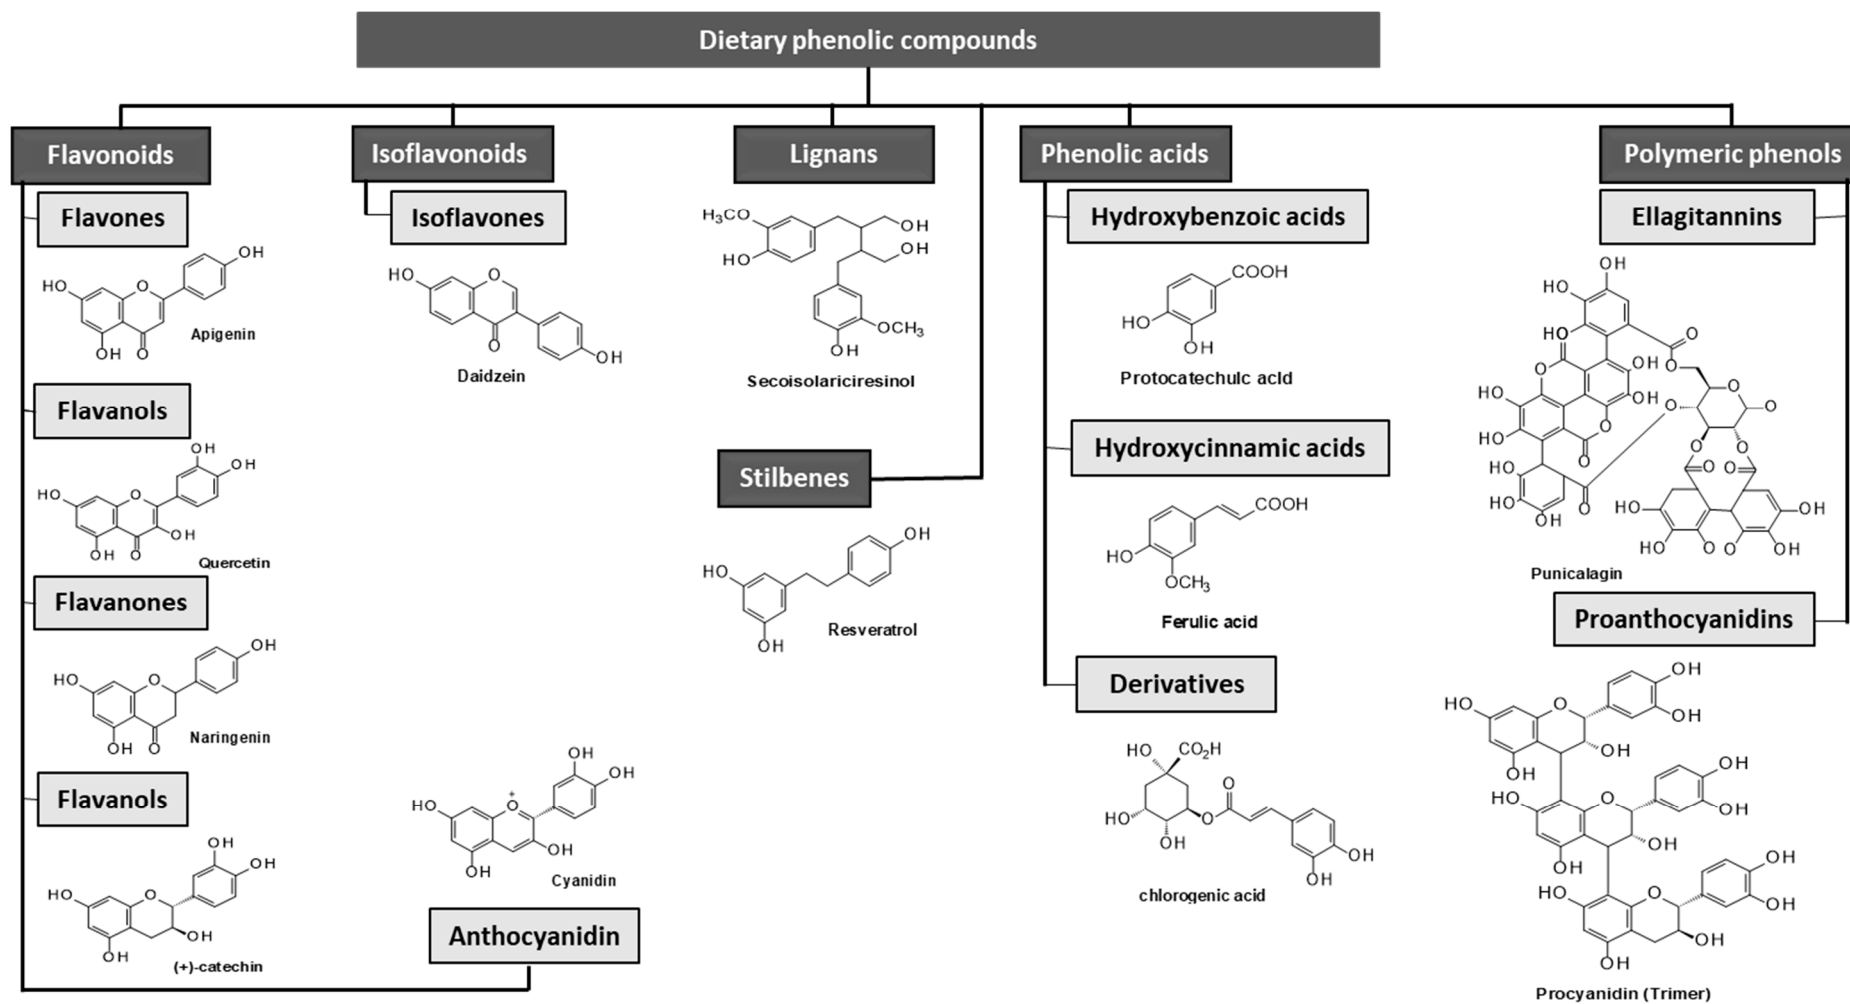

**Figure S1:** The categories and structures of dietary polyphenols. Polyphenols are subdivided into different categories: flavonoids, isoflavonoids, lignans, stilbenes, phenolic acids and phenolic polymers.

**Table S1: A list of all the known BAs from rodents and humans with their abbreviations used in the review.** \*Dehydrocholic acid is a synthetic BA, manufactured by the oxidation of cholic acid.

| <b>Name</b>                      | <b>Abbrev</b> | <b>Type of bile acid</b>                                 |
|----------------------------------|---------------|----------------------------------------------------------|
| Chenodeoxycholic acid            | CDCA          | Primary                                                  |
| Deoxycholic acid                 | DCA           | Secondary                                                |
| Dehydrocholic acid*              | DHCA          | Secondary                                                |
| Glycocholic acid                 | GCA           | Conjugated primary                                       |
| Glycochenodeoxycholic acid       | GCDCA         | Conjugated primary                                       |
| Glycodeoxycholic acid            | GDCA          | Conjugated secondary                                     |
| Lithocholic acid                 | LCA           | Secondary                                                |
| Taurocholic acid                 | TCA           | Conjugated primary                                       |
| Taurochenodeoxycholic acid       | TCDCA         | Conjugated primary                                       |
| Taurodeoxycholic acid            | TDCA          | Conjugated secondary                                     |
| Ursodeoxycholic acid             | UDCA          | Primary (mouse), Secondary (human)                       |
| Taurolithocholic acid            | TLCA          | Conjugated secondary                                     |
| $\alpha$ -Muricholic acid        | a-MCA         | Primary (mouse), not detected (human)                    |
| $\beta$ -Muricholic acid         | b-MCA         | Primary (mouse)                                          |
| Cholic acid                      | CA            | Primary                                                  |
| Glycolithocholic acid            | GLCA          | Conjugated secondary                                     |
| Hyodeoxycholic acid              | HDCA          | Secondary                                                |
| Muricholic acid                  | MCA           | Primary (mouse)                                          |
| Tauro- $\alpha$ -Muricholic acid | T-a-MCA       | Conjugated primary (mouse)                               |
| Tauro- $\beta$ -Muricholic acid  | T-b-MCA       | Conjugated primary (mouse)                               |
| Glycohyocholic acid              | GHCA          | Conjugated secondary                                     |
| Glycoursodeoxycholic acid        | GUDCA         | Conjugated primary (mouse), conjugated-secondary (human) |
| Taurohyocholic acid              | THCA          | Conjugated secondary                                     |
| Taurohyodeoxycholic acid         | THDCA         | Conjugated secondary                                     |
| Tauroursodeoxycholic acid        | TUDCA         | Conjugated-primary                                       |
| Glycohyodeoxycholic acid         | GHDCA         | Conjugated secondary                                     |
| Taurodehydrocholic acid          | TDHCA         | Conjugated secondary                                     |

**Table S2:** The published studies that have determined whether dietary polyphenols can alter BA excretion and *Cyp7a1* expression. NR= not reported

| Bioactive group                            | Specific Bioactive                        | Model                                      | Cholesterol                                                                     | Hepatic <i>Cyp7a1</i> expression         | Faecal bile acids                                                                        | Ref  |
|--------------------------------------------|-------------------------------------------|--------------------------------------------|---------------------------------------------------------------------------------|------------------------------------------|------------------------------------------------------------------------------------------|------|
| Phenolic polymers                          | Raisin                                    | Human                                      | NR                                                                              | NR                                       | Decreased                                                                                | [1]  |
| Phenolic polymers                          | Polymeric Tannins                         | Male Sprague-Dawley rats                   | Decreased plasma total and – LDL cholesterol                                    | NR                                       | Increased                                                                                | [2]  |
| Phenolic polymers                          | Tartaric acid                             | Human                                      | NR                                                                              | NR                                       | No change decrease with raisin control.                                                  | [3]  |
| Ellagitannin (phenolic polymer) metabolite | Ellagic acid                              | C3H/HeN female mice                        | NR                                                                              | Increased mRNA                           | NR                                                                                       | [4]  |
| Phenolic polymers                          | Grape seed extract (GPSE)                 | Golden Syrian hamsters                     | Decreased plasma total cholesterol                                              | A moderate increase in mRNA and protein. | Increased levels of LCA, DCA CDCA, CA and UDCA                                           | [5]  |
| Phenolic polymers                          | GPSE                                      | C57BL/6 WT and KO mice                     | Decreased serum cholesterol                                                     | Increased mRNA                           | Increased                                                                                | [6]  |
| Phenolic polymers                          | GPSE                                      | Pigs                                       | NR                                                                              | NR                                       | Increased                                                                                | [7]  |
| Phenolic polymers                          | GPSE                                      | Wistar rats                                | No change in Serum cholesterol levels, but hepatic cholesterol levels decreased | No change                                | Decreased                                                                                | [8]  |
| Phenolic polymers                          | Chardonnay grape seed flour               | Golden Syrian hamsters fed high-fat diets. | Decreased plasma total-, VLDL-, and LDL-cholesterol                             | Increased mRNA                           | NR                                                                                       | [9]  |
| Phenolic polymers                          | Polyphenols in red wine                   | Rats                                       | Lowered plasma LDL-cholesterol and slightly increased HDL-cholesterol.          | Increased mRNA                           | NR                                                                                       | [10] |
| Phenolic polymers                          | Grape Juice (other fruit juices reported) | Rats                                       | NR                                                                              | NR                                       | The intestinal contents contained higher concentrations of primary bile acids, but lower | [11] |

|                   |                              |                                                                                   |                                                                                                                                                 |                                                                                                |                                                            |      |
|-------------------|------------------------------|-----------------------------------------------------------------------------------|-------------------------------------------------------------------------------------------------------------------------------------------------|------------------------------------------------------------------------------------------------|------------------------------------------------------------|------|
| Phenolic polymers | GPSE                         | Pregnant female Wistar rats with the male adult offspring being examined          | The adult male offspring had increased total cholesterol-to-HDL-C ratios.                                                                       | mRNA down-regulation of <i>Cyp7A1</i> .                                                        | concentrations of secondary bile acids decreased           | [12] |
| Flavonol          | Fisetin                      | Sprague-Dawley Rats fed a high fat diet.                                          | Elevated levels of total and LDL-cholesterol, along with hepatic cholesterol content in a high fat group were significantly reduced by fisetin. | The high fat diet Increased <i>Cyp7a1</i> mRNA, which was subsequently reversed by the fisetin | NR                                                         | [13] |
| Stillbenes        | Resveratrol                  | C57BL/6 J and HepG2 cells                                                         | Improved serum lipids in mice.                                                                                                                  | Increased mRNA, protein enzyme activity (mice) and mRNA (HepG2 cells)                          | NR                                                         | [14] |
| Stillbenes        | Resveratrol                  | Donryu rats subcutaneously implanted with an ascites hepatoma cell line of AH109A | suppressed (VLDL + LDL)-cholesterol                                                                                                             | NR                                                                                             | Increased                                                  | [15] |
| Stillbenes        | Resveratrol (15 or 30 mg/kg) | Rats with liver injury induced by alpha-Naphthylisothiocyanate (AINT).            | NR                                                                                                                                              | Restoration of <i>Cyp7a1</i> levels disrupted by liver injury.                                 | Maintaining bile acid secretion originally reduced by AINT | [16] |

|            |                                                                                           |                                                          |                                                                                                                           |                                                                                                                                                               |                                                                                            |      |
|------------|-------------------------------------------------------------------------------------------|----------------------------------------------------------|---------------------------------------------------------------------------------------------------------------------------|---------------------------------------------------------------------------------------------------------------------------------------------------------------|--------------------------------------------------------------------------------------------|------|
| Stillbenes | 25µM Resveratrol and RSV-glucuronides                                                     | HepG2 cells                                              | Res and Gres both lowered total cholesterol in the cells.                                                                 | Significant increases in hepatic Cyp7a1 and bile salt export protein (BSEP)                                                                                   | NR                                                                                         | [17] |
| Flavanols  | Catechins                                                                                 | HepG2 cells                                              | NR                                                                                                                        | Increased <i>cyp7a1</i> mRNA after 24h. epicatechin gallate 5.5 fold; epigallocatechin-3-gallate 4.2 fold; epigallocatechin 2.9 fold and epicatechin 1.9 fold | NR                                                                                         | [18] |
| Flavanols  | EGCG (40 mg kg <sup>-1</sup> d <sup>-1</sup> and 80 mg kg <sup>-1</sup> d <sup>-1</sup> ) | Female C57BL/6 mouse                                     | Reduced total, and LDL cholesterol and increased HDL cholesterol.                                                         | Increased <i>Cyp7a1</i> mRNA levels                                                                                                                           | NR                                                                                         | [19] |
| Flavanols  | EGCG (green tea extract)                                                                  | Male C57BL mice with cholesterol-induced steatohepatitis | No changes in plasma cholesterol but a reduction in liver cholesterol in steatohepatitis mice                             | The mice with induced steatohepatitis demonstrated a shift from CYP7A1 pathway to the alternative acidic pathway increasing Cyp7a1 mRNA expression            | NR                                                                                         | [20] |
| Flavanols  | EGCG                                                                                      | Rats                                                     | NR                                                                                                                        |                                                                                                                                                               | biliary bile acid excretion was not altered, but EGCG treatment decreased bile flow by 23% | [21] |
| Flavanols  | Lung Chen tea                                                                             | Hypercholesteremic Sprague Dawley rats                   | significantly lowered the serum cholesterol                                                                               | <i>Cyp7a1</i> enzyme activity was not shown to be altered                                                                                                     | Increased faecal excretion of cholesterol                                                  | [22] |
| Flavanols  | Theaflavin-monogallates, theaflavin-3-gallate, and theaflavin-3'                          | ddY mice and 5-week-old Sprague-                         | Black tea extract decreased the postprandial rise in blood cholesterol levels after oral administration of cholesterol in | NR                                                                                                                                                            | NR                                                                                         | [23] |

|                |                                                                     |                                                                           |                                                                 |                              |                                                                                                         |      |
|----------------|---------------------------------------------------------------------|---------------------------------------------------------------------------|-----------------------------------------------------------------|------------------------------|---------------------------------------------------------------------------------------------------------|------|
|                | gallate (from black tea)                                            | Dawley (SD) rats                                                          | mice and in rats the extract reduced total and LDL cholesterol. |                              |                                                                                                         |      |
| Flavanols      | Black tea                                                           | Human study (hypercholesterolemic)                                        | NR                                                              | NR                           | No changes                                                                                              | [24] |
| Phenolic acids | Pu-erh Black tea extract 333mg/day over 3 months)                   | A double blind randomised study of borderline hypercholesterolemic people | Reduced LDL                                                     | NR                           | No changes in key bile acids. Total bile acids not measured                                             | [25] |
| Phenolic acid  | Pu-erh Black tea (a 4-month study in 21 patients ingesting 1 g/day) | Hypercholesterolemic patients.                                            | Reduced cholesterol                                             | NR                           | NR                                                                                                      | [26] |
| Phenolic acids | 8-weeks of 2% and 4% tea administration in the water                | Hypercholesterolemic Sprague-Dawley rats                                  | Lowered the serum cholesterol in the 2% and 4% group.           | No change                    | Increase in faecal bile acids                                                                           | [22] |
| Phenolic acids | Pu-erh black tea extract (0.3g/kg food) for 3 weeks                 | DdY mice fed cholesterol and hypercholesterolemic Sprague-Dawley rats     | Decreases in serum LDL- and total cholesterol                   | NR                           | NR                                                                                                      | [23] |
| Phenolic acid  | Chlorogenic acid (CGA)                                              | male 129/sv mice                                                          | NR                                                              | Increased <i>Cyp7a1</i> mRNA | AINT increased total bile acids in serum: the effects of AINT were normalised by co-treatment with CGA. | [27] |

|                 |                                                                                                                                                            |                                                                                                            |                                                                                          |                         |                                                                  |                                                                                                        |      |
|-----------------|------------------------------------------------------------------------------------------------------------------------------------------------------------|------------------------------------------------------------------------------------------------------------|------------------------------------------------------------------------------------------|-------------------------|------------------------------------------------------------------|--------------------------------------------------------------------------------------------------------|------|
| Polyphenol rich | Pu-erh tea, theabrownin (TB) fed for 45 days                                                                                                               | Hyperlipidemic Sprague-Dawley rats, either fed a normal diet, a high fat diet, or a high-fat diet plus TB. | LDL and total-cholesterol levels were decreased compared to the high fat diet fed group. | NR                      |                                                                  | The faecal bile acid content was higher in the TB Group than compared to both normal and high fat diet | [28] |
| Polyphenol rich | Glossogyne tenuifolia Cassini (herbal tea)                                                                                                                 | Syrian Hamsters                                                                                            | Reduced serum LDL- and total cholesterol                                                 | NR                      |                                                                  | Increased                                                                                              | [29] |
| Polyphenol rich | Ecklonia cava Brown algae extract (300 mg/kg)                                                                                                              | C57BL6 mice fed a high fat diet                                                                            | Reduced serum LDL- and total cholesterol                                                 | Increased <i>cyp7a1</i> |                                                                  | NR                                                                                                     | [30] |
| Anthocyanin     | Cyanidin-3-O- $\beta$ -glucoside (anthocyanin)                                                                                                             | Five-week-old male ApoE <sup>-/-</sup> mice and primary hepatocytes                                        | NR                                                                                       |                         | Increased <i>Cyp7a1</i> mRNA in mice and in primary hepatocytes. | Increased faecal bile acid excretion in mice and bile acid synthesis from primary hepatocytes          | [31] |
| Anthocyanin     | Anthocyanin-rich black elderberry extract (BEE) - rich in cyanidin 3-sambubioside and cyanidin 3-glucoside                                                 | Male apoE <sup>(-/-)</sup> mice fed an AIN-93M diet plus 1.25% (w/w) BEE or control diet for 6 weeks       | No changes                                                                               |                         | Decreased <i>Cyp7a1</i>                                          | NR                                                                                                     | [32] |
| Anthocyanin     | Anthocyanin-rich extracts from bilberry ( <i>Vaccinium myrtillus</i> L.), chokeberry ( <i>Aronia melanocarpa</i> E.), and grape ( <i>Vitis vinifera</i> ). | Fischer rats given a colon carcinogen (azoxymethane) (as the aim of this study was to assess               | NR                                                                                       |                         | NR                                                               | Reduction in faecal bile acids                                                                         | [33] |

|                                                                                                                                        |                                                                   |                                                                                                                                 |                                                                                                              |                                                                           |                                                                                |          |
|----------------------------------------------------------------------------------------------------------------------------------------|-------------------------------------------------------------------|---------------------------------------------------------------------------------------------------------------------------------|--------------------------------------------------------------------------------------------------------------|---------------------------------------------------------------------------|--------------------------------------------------------------------------------|----------|
| Anthocyanin                                                                                                                            | Red pericarp glutinous rice compared to brown rice (anthocyanins) | biomarkers of colon cancer)<br>Hypercholesterolemic C57BL/6 mice (12 weeks)                                                     | Decreased serum and hepatic LDL-cholesterol                                                                  | Induced <i>Cyp7a1</i> expression but decreased hepatic cholesterol levels | Not measured                                                                   | [34]     |
| Anthocyanin                                                                                                                            | Lingonberries (LBs)                                               | Male ApoE <sup>-/-</sup> mice were fed either low-fat diet, high-fat diet, or high-fat diet with 44% lingonberries for 8 weeks. | Mice fed LBs showed reduced levels of total cholesterol compared to the HF control                           | Increase in <i>Cyp7a1</i> expression                                      | NR                                                                             | [35]     |
| Anthocyanins (cyanidin 3-O-glucoside, cyanidin 3-O-rutinoside, cyanidin 3-O-galactoside, and cyanidin 3-O-galactopyranosyl-rhamnoside) | Buckwheat sprouts ( <i>Fagopyrum esculentum Moench</i> )          | Type 2 diabetic mice                                                                                                            | Decreased serum cholesterol, liver cholesterol and triglycerides                                             | Increased <i>Cyp7a1</i> mRNA                                              | Increased faecal bile acids                                                    | [36, 37] |
| Flavonol                                                                                                                               | Kaempferol (150 mg/day/kg body weight)                            | Apo E <sup>-/-</sup> Mice                                                                                                       | Increased HDL cholesterol and reduced total, LDL and hepatic cholesterol concentrations compared to controls | Increased hepatic mRNA expression of <i>Cyp7a1</i>                        | Increased faecal bile acid excretion                                           | [38]     |
| Flavonol                                                                                                                               | Quercetin (0.4%)                                                  | Male Wistar rats                                                                                                                | No change in serum TC, or HDL cholesterol But, serum LDL was increased.                                      | Elevated <i>Cyp7a1</i> mRNA and protein                                   | Increased secreted bile acids and total liver bile acids. Upregulation of bile | [39]     |



|                      |                                                                                               |                                                                                                               |                                                                                                                                                                                                                |                                                 |                                                                                |          |
|----------------------|-----------------------------------------------------------------------------------------------|---------------------------------------------------------------------------------------------------------------|----------------------------------------------------------------------------------------------------------------------------------------------------------------------------------------------------------------|-------------------------------------------------|--------------------------------------------------------------------------------|----------|
| Flavonol             | Black bean seed coat extract containing predominantly quercetin 3-O-glucoside and soyasaponin | C57BL/6                                                                                                       | BBE reduced the levels of total cholesterol and HDL-cholesterol in the serum of mice fed the control diet. The effects were enhanced in high-cholesterol diet mice (decreased LDL, total cholesterol and HDL). | Increased CYP7A1 protein expression             | acid transporters in the liver.<br>significant increase in bile acid secretion | [40]     |
| Flavanol combination | Quercetin and leucodelphinidin                                                                | hypercholesteremic rats                                                                                       | Reduction in serum LDL- and total cholesterol, Increase in the HDL                                                                                                                                             | Not observed                                    | Increased hepatic and faecal bile acids                                        | [41]     |
| Flavanol combination | Quercetin fed alongside extracts of the Banyan tree, leucopelargonin and leucocyanin          | Hypercholesteremic rats                                                                                       | Decreased total cholesterol levels                                                                                                                                                                             | NR                                              | Increased hepatic and faecal bile acids                                        | [42]     |
| Flavanone            | Naringin                                                                                      | Human liver HepG2 cells                                                                                       | NR                                                                                                                                                                                                             | Induced <i>Cyp7a1</i> mRNA expression           | NR                                                                             | [43]     |
| Flavone              | Flavone C-glycoside rich leaf extract from Taioba ( <i>Xanthosoma sagittifolium</i> )         | Wistar rats                                                                                                   | NR                                                                                                                                                                                                             | NR                                              | No change in total BAs but did diminish the levels of secondary BAs            | [44, 45] |
| Isoflavonoid         | Puerarin - the major bioactive ingredient from Japanese arrowroot (Pueraria lobate).          | Male ICR mice intragastrically administered 400mg/kg of puerarin at the same time as exposure to a reagent to | Increases in serum cholesterol and LDL were suppressed                                                                                                                                                         | Increases in hepatic <i>Cyp7a1</i> mRNA levels. | NR                                                                             | [46]     |

|                                           |                                                                                                                                                                                                                  |                                                                                              |                                                                                                       |                                                                                                         |                                                                                                                                       |      |
|-------------------------------------------|------------------------------------------------------------------------------------------------------------------------------------------------------------------------------------------------------------------|----------------------------------------------------------------------------------------------|-------------------------------------------------------------------------------------------------------|---------------------------------------------------------------------------------------------------------|---------------------------------------------------------------------------------------------------------------------------------------|------|
| Isoflavonoid                              | Puerarin                                                                                                                                                                                                         | induce lipidemia<br>Spague-Dawley rats fed 300mg/kg/day puerarin and hypercholesteremic diet | Attenuated the increased total cholesterol induced by hypercholesteremic diet in both serum and liver | <i>Cyp7a1</i> hepatic mRNA induction                                                                    | NR                                                                                                                                    | [47] |
| Isoflavonoid                              | Puerarin and puerarin glycosides                                                                                                                                                                                 | C57BL/6J mice fed a 0.1% puerarin diet.<br>Human HepG2 liver cells.                          | Puerarin glycosides significantly reduced plasma total cholesterol levels.                            | Increased hepatic <i>Cyp7a1</i> mRNA expression in the mouse study, but no effect in HepG2 cells.       | NR                                                                                                                                    | [48] |
| Isoflavones, monacolins and phytosterols. | Xuezhikang, is an extract of red yeast rice. 3 fractions containing isoflavones, monacolins or phytosterols, respectively were given to mice on a high-fat diet and compared to a control or total extract group | C57BL/6 mice                                                                                 | Total fraction - reduced serum TC, and LDL-C and increased serum HDL-C                                | The total extract and the isoflavone extract were more potent at inducing <i>Cyp7a1</i> gene expression | The total extract and all three fractions Reduced liver bile acids and increased cholesterol and bile acid secretion into the faeces. | [49] |
| Isoflavone                                | <i>Erythrina lysistemon</i> , a species of tree in the pea family, containing alpinumisoflavone                                                                                                                  | Ovariectomized rats                                                                          | NR                                                                                                    | Upregulates <i>Cyp7a1</i> liver mRNA expression                                                         | NR                                                                                                                                    | [50] |

**Table S3:** Effects of polyphenols on ASBT protein and gene expression

| Food component or polyphenol | Human                                                                                                                                                                                                                            | Rodents                                                                                                                                                                                                                                                                                       | Ref                  |
|------------------------------|----------------------------------------------------------------------------------------------------------------------------------------------------------------------------------------------------------------------------------|-----------------------------------------------------------------------------------------------------------------------------------------------------------------------------------------------------------------------------------------------------------------------------------------------|----------------------|
| Barley                       | NR                                                                                                                                                                                                                               | Reduced ASBT gene and protein expression in the intestine by 51% and 30%, respectively in mice fed high $\beta$ -glucan (fibre) barley alongside a high fat diet                                                                                                                              | [51]                 |
| EGCG                         | In HEK-293 cells decreased ASBT function in a time and a dose-dependent manner. Strongly inhibited ASBT activity in colonic Caco2 cells                                                                                          | No effects on gene expression in C57BL/6J mice                                                                                                                                                                                                                                                | [52]<br>[52]<br>[53] |
| Procyanidin extract (GSPE)   | In Caco2 cells, where GSPE reduced ASBT in a dose-dependent manner                                                                                                                                                               | Downregulated ASBT expression in C57BL/6 mice                                                                                                                                                                                                                                                 | [6, 54]              |
| Resveratrol                  | Reduces both ASBT function and protein expression in transiently transfected COS-1 cells in a dose dependent manner, without altering gene expression. In Caco2 a high concentration of resveratrol induced ASBT gene expression | In C57BL/6J and <i>ApoE</i> <sup>-/-</sup> mice resveratrol had no effects on ASBT but increased faecal BAs. Increased levels of the genera <i>Lactobacillus</i> and <i>Bifidobacterium</i> , bile salt hydrolase (BSH) activity and thereby enhancing BA de-conjugation and faecal excretion | [55,<br>56]          |

## References:

1. Spiller GA, Story JA, Lodics TA, Pollack M, Monyan S, Butterfield G, Spiller M: **Effect of sun-dried raisins on bile acid excretion, intestinal transit time, and fecal weight: a dose-response study.** *J Med Food* 2003, **6**:87-91.
2. Tebib K, Besancon P, Rouanet JM: **Dietary grape seed tannins affect lipoproteins, lipoprotein lipases and tissue lipids in rats fed hypercholesterolemic diets.** *J Nutr* 1994, **124**:2451-2457.
3. Spiller GA, Story JA, Furumoto EJ, Chezem JC, Spiller M: **Effect of tartaric acid and dietary fibre from sun-dried raisins on colonic function and on bile acid and volatile fatty acid excretion in healthy adults.** *Br J Nutr* 2003, **90**:803-807.
4. Yao R, Yasuoka A, Kamei A, Ushiyama S, Kitagawa Y, Rogi T, Shibata H, Abe K, Misaka T: **Nuclear receptor-mediated alleviation of alcoholic fatty liver by polyphenols contained in alcoholic beverages.** *PLoS One* 2014, **9**:e87142.
5. Jiao R, Zhang Z, Yu H, Huang Y, Chen ZY: **Hypocholesterolemic activity of grape seed proanthocyanidin is mediated by enhancement of bile acid excretion and up-regulation of CYP7A1.** *J Nutr Biochem* 2010, **21**:1134-1139.
6. Heidker RM, Caiozzi GC, Ricketts ML: **Dietary procyanidins selectively modulate intestinal farnesoid X receptor-regulated gene expression to alter enterohepatic bile acid recirculation: elucidation of a novel mechanism to reduce triglyceridemia.** *Mol Nutr Food Res* 2016, **60**:727-736.
7. Quifer-Rada P, Choy YY, Calvert CC, Waterhouse AL, Lamuela-Raventos RM: **Use of metabolomics and lipidomics to evaluate the hypocholesterolemic effect of Proanthocyanidins from grape seed in a pig model.** *Mol Nutr Food Res* 2016, **60**:2219-2227.
8. Downing LE, Heidker RM, Caiozzi GC, Wong BS, Rodriguez K, Del Rey F, Ricketts ML: **A Grape Seed Procyanidin Extract Ameliorates Fructose-Induced Hypertriglyceridemia in Rats via Enhanced Fecal Bile Acid and Cholesterol Excretion and Inhibition of Hepatic Lipogenesis.** *PLoS One* 2015, **10**:e0140267.
9. Kim H, Bartley GE, Arvik T, Lipson R, Nah SY, Seo K, Yokoyama W: **Dietary supplementation of chardonnay grape seed flour reduces plasma cholesterol concentration, hepatic steatosis, and abdominal fat content in high-fat diet-induced obese hamsters.** *J Agric Food Chem* 2014, **62**:1919-1925.
10. Del Bas JM, Fernandez-Larrea J, Blay M, Ardevol A, Salvado MJ, Arola L, Blade C: **Grape seed procyanidins improve atherosclerotic risk index and induce liver CYP7A1 and SHP expression in healthy rats.** *Faseb j* 2005, **19**:479-481.
11. Sembries S, Dongowski G, Mehrlander K, Will F, Dietrich H: **Physiological effects of extraction juices from apple, grape, and red beet pomaces in rats.** *J Agric Food Chem* 2006, **54**:10269-10280.
12. Del Bas JM, Crescenti A, Arola-Arnal A, Oms-Oliu G, Arola L, Caimari A: **Intake of grape procyanidins during gestation and lactation impairs reverse cholesterol transport and increases atherogenic risk indexes in adult offspring.** *J Nutr Biochem* 2015, **26**:1670-1677.
13. Shin MJ, Cho Y, Moon J, Jeon HJ, Lee SM, Chung JH: **Hypocholesterolemic effect of daily fisetin supplementation in high fat fed Sprague-Dawley rats.** *Food Chem Toxicol* 2013, **57**:84-90.
14. Chen Q, Wang E, Ma L, Zhai P: **Dietary resveratrol increases the expression of hepatic 7alpha-hydroxylase and ameliorates hypercholesterolemia in high-fat fed C57BL/6J mice.** *Lipids Health Dis* 2012, **11**:56.
15. Miura D, Miura Y, Yagasaki K: **Hypolipidemic action of dietary resveratrol, a phytoalexin in grapes and red wine, in hepatoma-bearing rats.** *Life Sci* 2003, **73**:1393-1400.
16. Wang T, Zhou ZX, Sun LX, Li X, Xu ZM, Chen M, Zhao GL, Jiang ZZ, Zhang LY: **Resveratrol effectively attenuates alpha-naphthyl-isothiocyanate-induced acute cholestasis and liver**

- injury through choleretic and anti-inflammatory mechanisms.** *Acta Pharmacol Sin* 2014, **35**:1527-1536.
17. Shao D, Wang Y, Huang Q, Shi J, Yang H, Pan Z, Jin M, Zhao H, Xu X: **Cholesterol-Lowering Effects and Mechanisms in View of Bile Acid Pathway of Resveratrol and Resveratrol Glucuronides.** *J Food Sci* 2016.
  18. Lee MS, Park JY, Freake H, Kwun IS, Kim Y: **Green tea catechin enhances cholesterol 7 $\alpha$ -hydroxylase gene expression in HepG2 cells.** *Br J Nutr* 2008, **99**:1182-1185.
  19. Shan D, Fang Y, Ye Y, Liu J: **EGCG reducing the susceptibility to cholesterol gallstone formation through the regulation of inflammation.** *Biomedicine & Pharmacotherapy* 2008, **62**:677-683.
  20. Hirsch N, Konstantinov A, Anavi S, Aronis A, Hagay Z, Madar Z, Tirosh O: **Prolonged feeding with green tea polyphenols exacerbates cholesterol-induced fatty liver disease in mice.** *Mol Nutr Food Res* 2016.
  21. Hirsova P, Karlasova G, Dolezelova E, Cermanova J, Zagorova M, Kadova Z, Hroch M, Sispera L, Tomsik P, Lenicek M, et al: **Cholestatic effect of epigallocatechin gallate in rats is mediated via decreased expression of Mrp2.** *Toxicology* 2013, **303**:9-15.
  22. Yang TT, Koo MW: **Chinese green tea lowers cholesterol level through an increase in fecal lipid excretion.** *Life Sci* 2000, **66**:411-423.
  23. Fujita H, Yamagami T: **Extract of black tea (pu-ehr) inhibits postprandial rise in serum cholesterol in mice, and with long term use reduces serum cholesterol and low density lipoprotein levels and renal fat weight in rats.** *Phytother Res* 2008, **22**:1275-1281.
  24. Mai V, Katki HA, Harmsen H, Gallaher D, Schatzkin A, Baer DJ, Clevidence B: **Effects of a controlled diet and black tea drinking on the fecal microflora composition and the fecal bile acid profile of human volunteers in a double-blinded randomized feeding study.** *J Nutr* 2004, **134**:473-478.
  25. Fujita H, Yamagami T: **Antihypercholesterolemic effect of Chinese black tea extract in human subjects with borderline hypercholesterolemia.** *Nutr Res* 2008, **28**:450-456.
  26. Fujita H, Yamagami T: **Efficacy and safety of Chinese black tea (Pu-Ehr) extract in healthy and hypercholesterolemic subjects.** *Ann Nutr Metab* 2008, **53**:33-42.
  27. Tan Z, Luo M, Yang J, Cheng Y, Huang J, Lu C, Song D, Ye M, Dai M, Gonzalez FJ, et al: **Chlorogenic acid inhibits cholestatic liver injury induced by alpha-naphthylisothiocyanate: involvement of STAT3 and NFkappaB signalling regulation.** *J Pharm Pharmacol* 2016, **68**:1203-1213.
  28. Gong J, Peng C, Chen T, Gao B, Zhou H: **Effects of theabrownin from pu-erh tea on the metabolism of serum lipids in rats: mechanism of action.** *J Food Sci* 2010, **75**:H182-189.
  29. Lee YN, Hsu GS, Lin WT, Lu YF: **Hypolipidemic and Antioxidative Effects of *Glossogyne tenuifolia* in Hamsters Fed an Atherogenic Diet.** *J Med Food* 2016, **19**:513-517.
  30. Park EY, Choi H, Yoon JY, Lee IY, Seo Y, Moon HS, Hwang JH, Jun HS: **Polyphenol-Rich Fraction of *Ecklonia cava* Improves Nonalcoholic Fatty Liver Disease in High Fat Diet-Fed Mice.** *Mar Drugs* 2015, **13**:6866-6883.
  31. Wang D, Xia M, Gao S, Li D, Zhang Y, Jin T, Ling W: **Cyanidin-3-O-beta-glucoside upregulates hepatic cholesterol 7 $\alpha$ -hydroxylase expression and reduces hypercholesterolemia in mice.** *Mol Nutr Food Res* 2012, **56**:610-621.
  32. Farrell N, Norris G, Lee SG, Chun OK, Blesso CN: **Anthocyanin-rich black elderberry extract improves markers of HDL function and reduces aortic cholesterol in hyperlipidemic mice.** *Food Funct* 2015, **6**:1278-1287.
  33. Lala G, Malik M, Zhao C, He J, Kwon Y, Giusti MM, Magnuson BA: **Anthocyanin-rich extracts inhibit multiple biomarkers of colon cancer in rats.** *Nutr Cancer* 2006, **54**:84-93.
  34. Park Y, Park EM, Kim EH, Chung IM: **Hypocholesterolemic metabolism of dietary red pericarp glutinous rice rich in phenolic compounds in mice fed a high cholesterol diet.** *Nutr Res Pract* 2014, **8**:632-637.

35. Matziouridou C, Marungruang N, Nguyen TD, Nyman M, Fak F: **Lingonberries reduce atherosclerosis in Apoe(-/-) mice in association with altered gut microbiota composition and improved lipid profile.** *Mol Nutr Food Res* 2016, **60**:1150-1160.
36. Watanabe M, Ayugase J: **Effects of buckwheat sprouts on plasma and hepatic parameters in type 2 diabetic db/db mice.** *J Food Sci* 2010, **75**:H294-299.
37. Kim SJ, Maeda T, Sarker MZ, Takigawa S, Matsuura-Endo C, Yamauchi H, Mukasa Y, Saito K, Hashimoto N, Noda T, et al: **Identification of anthocyanins in the sprouts of buckwheat.** *J Agric Food Chem* 2007, **55**:6314-6318.
38. Hoang MH, Jia Y, Mok B, Jun HJ, Hwang KY, Lee SJ: **Kaempferol ameliorates symptoms of metabolic syndrome by regulating activities of liver X receptor-beta.** *J Nutr Biochem* 2015, **26**:868-875.
39. Zhang M, Xie Z, Gao W, Pu L, Wei J, Guo C: **Quercetin regulates hepatic cholesterol metabolism by promoting cholesterol-to-bile acid conversion and cholesterol efflux in rats.** *Nutr Res* 2016, **36**:271-279.
40. Chavez-Santoscoy RA, Gutierrez-Uribe JA, Granados O, Torre-Villalvazo I, Serna-Saldivar SO, Torres N, Palacios-González B, Tovar AR: **Flavonoids and saponins extracted from black bean (*Phaseolus vulgaris* L.) seed coats modulate lipid metabolism and biliary cholesterol secretion in C57BL/6 mice.** *British Journal of Nutrition* 2014, **112**:886-899.
41. Mathew BC, Yoseph BA, Dessale T, Daniel RS, Alemayehu A, Campbell IW, Augusti KT: **Hypolipidaemic effect of Leucodelphinidin derivative from *Ficus bengalensis* Linn on Cholesterol fed rats.** *Research Journal of Chemical Sciences* 2012, **2**:54-60.
42. Daniel RS, Devi KS, Augusti KT, Sudhakaran Nair CR: **Mechanism of action of antiatherogenic and related effects of *Ficus bengalensis* Linn. flavonoids in experimental animals.** *Indian J Exp Biol* 2003, **41**:296-303.
43. Liang J, Wang C, Peng J, Li W, Jin Y, Liu Q, Meng Q, Liu K, Sun H: **Naringin regulates cholesterol homeostasis and inhibits inflammation via modulating NF-kappaB and ERK signaling pathways in vitro.** *Pharmazie* 2016, **71**:101-108.
44. Picerno P, Mencherini T, Lauro MR, Barbato F, Aquino R: **Phenolic Constituents and Antioxidant Properties of *Xanthosoma violaceum* Leaves.** *Journal of Agricultural and Food Chemistry* 2003, **51**:6423-6428.
45. de Almeida Jackix E, Monteiro EB, Raposo HF, Vanzela EC, Amaya-Farfan J: **Taioba (*Xanthosoma sagittifolium*) leaves: nutrient composition and physiological effects on healthy rats.** *J Food Sci* 2013, **78**:H1929-1934.
46. Ma JQ, Ding J, Zhao H, Liu CM: **Puerarin attenuates carbon tetrachloride-induced liver oxidative stress and hyperlipidaemia in mouse by JNK/c-Jun/CYP7A1 pathway.** *Basic Clin Pharmacol Toxicol* 2014, **115**:389-395.
47. Yan LP, Chan SW, Chan AS, Chen SL, Ma XJ, Xu HX: **Puerarin decreases serum total cholesterol and enhances thoracic aorta endothelial nitric oxide synthase expression in diet-induced hypercholesterolemic rats.** *Life Sci* 2006, **79**:324-330.
48. Chung MJ, Sung N-J, Park C-S, Kweon D-K, Mantovani A, Moon T-W, Lee S-J, Park K-H: **Antioxidative and hypocholesterolemic activities of water-soluble puerarin glycosides in HepG2 cells and in C57 BL/6J mice.** *European Journal of Pharmacology* 2008, **578**:159-170.
49. Feng D, Sun JG, Sun RB, Ou-Yang BC, Yao L, Aa JY, Zhou F, Zhang JW, Zhang J, Wang GJ: **Isoflavones and phytosterols contained in Xuezhikang capsules modulate cholesterol homeostasis in high-fat diet mice.** *Acta Pharmacol Sin* 2015, **36**:1462-1472.
50. Mvondo MA, Njamen D, Kretzschmar G, Imma Bader M, Tanee Fomum S, Wandji J, Vollmer G: **Alpinumisoflavone and abyssinone V 4'-methylether derived from *Erythrina lysistemon* (Fabaceae) promote HDL-cholesterol synthesis and prevent cholesterol gallstone formation in ovariectomized rats.** *J Pharm Pharmacol* 2015, **67**:990-996.

51. Hoang MH, Houg SJ, Jun HJ, Lee JH, Choi JW, Kim SH, Kim YR, Lee SJ: **Barley intake induces bile acid excretion by reduced expression of intestinal ASBT and NPC1L1 in C57BL/6J mice.** *J Agric Food Chem* 2011, **59**:6798-6805.
52. Annaba F, Kumar P, Dudeja AK, Saksena S, Gill RK, Alrefai WA: **Green tea catechin EGCG inhibits ileal apical sodium bile acid transporter ASBT.** *Am J Physiol Gastrointest Liver Physiol* 2010, **298**:G467-473.
53. Liu SW, Wu ZY, Guo S, Meng XJ, Chang XD: **Polyphenol-rich extract from wild Lonicera caerulea berry reduces cholesterol accumulation by mediating the expression of hepatic miR-33 and miR-122, HMGCR, and CYP7A1 in rats.** *Journal of Functional Foods* 2018, **40**:648-658.
54. Heidker RM, Caiozzi GC, Ricketts ML: **Grape Seed Procyanidins and Cholestyramine Differentially Alter Bile Acid and Cholesterol Homeostatic Gene Expression in Mouse Intestine and Liver.** *PLoS One* 2016, **11**:e0154305.
55. Chothe PP, Swaan PW: **Resveratrol promotes degradation of the human bile acid transporter ASBT (SLC10A2).** *Biochem J* 2014, **459**:301-312.
56. Chen ML, Yi L, Zhang Y, Zhou X, Ran L, Yang J, Zhu JD, Zhang QY, Mi MT: **Resveratrol Attenuates Trimethylamine-N-Oxide (TMAO)-Induced Atherosclerosis by Regulating TMAO Synthesis and Bile Acid Metabolism via Remodeling of the Gut Microbiota.** *MBio* 2016, **7**:e02210-02215.
